# Supplementary material
Source: PubMed Central journal article supplement (PMC3567680)
Supplement: supp_M112.412064_jbc.M112.412064-1.pdf [file supp_M112.412064_jbc.M112.412064-1.pdf]

## Derivation of $Y_{\text{reduced}}$ and $E_{\text{midpoint(Obs)}}$ for redox titrations of deoxy- $\alpha \pm$ AHSP

The following derivation is based in large part on Moore and Pettigrew (1):

Thermodynamic Scheme:

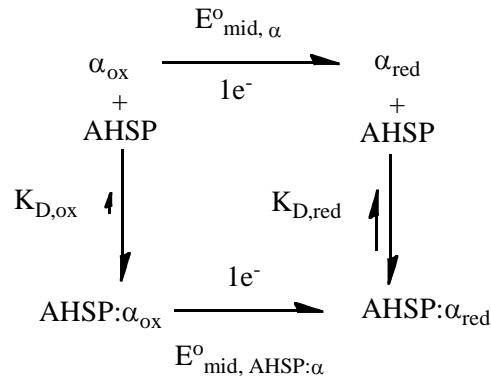

**Scheme 1.** A thermochemical cycle showing the redox equilibrium of free and AHSP-bound  $\alpha$  subunits (horizontal) and the association and dissociation equilibrium (vertical) of AHSP with oxidized and reduced  $\alpha$  subunits ( $\alpha_{\text{ox}}$  and  $\alpha_{\text{red}}$ , respectively).

Reactions:

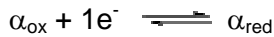

Equilibrium equations:

$$E_{\text{halfcell}} \text{ or } E_{\text{obs}} = E_{\text{mid}, \text{Hb}}^0 - \frac{RT}{nF} \ln \left( \frac{[\alpha_{\text{red}}]}{[\alpha_{\text{ox}}]} \right) \text{ or}$$

$$\frac{[\alpha_{\text{red}}]}{[\alpha_{\text{ox}}]} = \exp \left( \frac{-nF(E_{\text{obs}} - E_{\text{mid}, \alpha}^0)}{RT} \right)$$

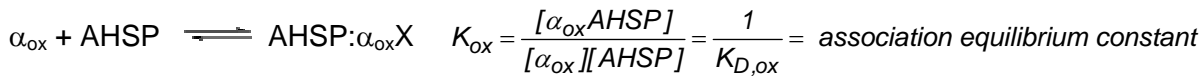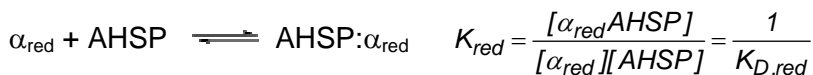

Definition of the Fraction reduced,  $Y_{\text{reduced}}$ :

Define relative concentrations from equilibria above:

$$Y_{\text{reduced}} = \frac{[\alpha_{\text{red}}] + [\alpha_{\text{red}}\text{AHSP}]}{[\alpha_{\text{ox}}] + [\alpha_{\text{ox}}\text{AHSP}] + [\alpha_{\text{red}}] + [\alpha_{\text{red}}\text{AHSP}]}$$

$$Y_{\text{reduced}} = \frac{\exp \left( \frac{-nF(E_{\text{obs}} - E_{\text{mid}, \alpha}^0)}{RT} \right) + K_{\text{red}}[\text{AHSP}] \exp \left( \frac{-nF(E_{\text{obs}} - E_{\text{mid}, \alpha}^0)}{RT} \right)}{1 + K_{\text{ox}}[\text{AHSP}] + \exp \left( \frac{-nF(E_{\text{obs}} - E_{\text{mid}, \alpha}^0)}{RT} \right) + K_{\text{red}}[\text{AHSP}] \exp \left( \frac{-nF(E_{\text{obs}} - E_{\text{mid}, \alpha}^0)}{RT} \right)}$$

$$\begin{aligned}
[\alpha_{ox}] &= 1 \\
[\alpha_{red}] &= \exp\left(\frac{-nF(E_{obs} - E_{mid,\alpha}^0)}{RT}\right) \\
[\alpha_{ox}ASHP] &= K_{ox}[ASHP] \\
[\alpha_{red}AHSP] &= K_{red}[AHSP]\exp\left(\frac{-nF(E_{obs} - E_{mid,\alpha}^0)}{RT}\right)
\end{aligned}$$

$$Y_{reduced} = \frac{(1 + K_{red}[AHSP])\exp\left(\frac{-nF(E_{obs} - E_{mid,\alpha}^0)}{RT}\right)}{1 + K_{ox}[ASHP] + (1 + K_{red}[AHSP])\exp\left(\frac{-nF(E_{obs} - E_{mid,\alpha}^0)}{RT}\right)}$$

$$Y_{reduced} = \frac{\frac{(1 + K_{red}[AHSP])\exp\left(\frac{-nF(E_{obs} - E_{mid,\alpha}^0)}{RT}\right)}{(1 + K_{ox}[ASHP])}}{1 + \frac{(1 + K_{red}[ASHP])\exp\left(\frac{-nF(E_{obs} - E_{mid,\alpha}^0)}{RT}\right)}{(1 + K_{ox}[ASHP])}}$$

At the midpoint when  $Y_{reduced} = 0.5$  or  $\sum_{reduced\ species} = \sum_{oxidized\ species}$  and  $E_{obs} = E_{mid,obs}$

$$0.5 = \frac{\frac{(1 + K_{red}[AHSP])\exp\left(\frac{-nF(E_{mid,obs} - E_{mid,\alpha}^0)}{RT}\right)}{(1 + K_{ox}[ASHP])}}{1 + \frac{(1 + K_{red}[ASHP])\exp\left(\frac{-nF(E_{mid,obs} - E_{mid,\alpha}^0)}{RT}\right)}{(1 + K_{ox}[ASHP])}} \Rightarrow \frac{(1 + K_{red}[AHSP])\exp\left(\frac{-nF(E_{mid,obs} - E_{mid,\alpha}^0)}{RT}\right)}{(1 + K_{ox}[ASHP])} = 1$$

$$\exp\left(\frac{-nF(E_{mid,obs} - E_{mid,\alpha}^0)}{RT}\right) = \frac{(1 + K_{ox}[ASHP])}{(1 + K_{red}[AHSP])} \Rightarrow (E_{mid,obs} - E_{mid,\alpha}^0) = -\frac{RT}{nF} \ln\left(\frac{(1 + K_{ox}[ASHP])}{(1 + K_{red}[ASHP])}\right)$$

$$E_{mid,obs} = E_{mid,\alpha}^0 - \frac{RT}{nF} \ln\left(\frac{(1 + K_{ox}[ASHP])}{(1 + K_{red}[AHSP])}\right) = E_{mid,\alpha}^0 - \frac{RT}{nF} \ln\left(\frac{1 + \frac{[ASHP]}{K_{D,ox}}}{1 + \frac{[AHSP]}{K_{D,red}}}\right)$$

(This expression assumes  $[AHSP] = [AHSP]_{free}$ )

## B. Estimation of $K_{D,red}$ from change in midpoint potential at a slight excess of AHSP.

1. The ratios of  $[AHSP]/K_{D,s}$  are  $\gg 1$  because  $[AHSP]$  is on the order of 1-20  $\mu\text{M}$  and  $K_{D,ox} \sim 0.00017\mu\text{M}$  and  $K_{D,red} \sim 0.020\mu\text{M}$ . Under these conditions:

$$E_{mid,obs} \approx E_{mid,\alpha}^0 - \frac{RT}{nF} \ln\left(\frac{\frac{[ASHP]}{K_{D,ox}}}{\frac{[AHSP]}{K_{D,red}}}\right) \approx E_{mid,\alpha}^0 - \frac{RT}{nF} \ln\left(\frac{K_{D,red}}{K_{D,ox}}\right) \quad \text{or} \quad \frac{K_{D,red}}{K_{D,ox}} = \exp\left(\frac{nF(E_{mid,\alpha}^0 - E_{mid,obs})}{RT}\right)$$

$$\text{Thus: } \frac{K_{D,red}}{K_{D,ox}} = \exp\left(\frac{nF(0.040 - (-0.078))}{RT}\right) = \exp\left(\frac{1 * 96,485 * 0.118}{8.314 * 281}\right) = 126$$

This value agrees well with the ratio calculated using kinetic parameters determined by Mollan et al. (2):

$$\frac{K_{D,red}}{K_{D,ox}} = \frac{0.017\mu\text{M}}{0.00017\mu\text{M}} = 100$$

References:

1. Moore, G. R., and Pettigrew, G. W. (1990) *Cytochromes c: evolutionary, structural, and physicochemical aspects*, Springer-Verlag, Berlin, New York
2. Mollan, T. L., Khandros, E., Weiss, M. J., and Olson, J. S. (2012) The kinetics of alpha-globin binding to alpha hemoglobin stabilizing protein (AHSP) indicate preferential stabilization of a heme-chrome folding intermediate. *J. Biol. Chem.* **287**, 11338-11350
